# Supplementary material for: New Variants of Pseudomonas aeruginosa High-Risk Clone ST233 Associated with an Outbreak in a Mexican Paediatric Hospital
Source: MDPI journal article supplement (doi:10.3390/microorganisms10081533), 2022-07-29
Supplement: s1 [file s1]

**Supplementary Table S1. Clinical patients features**

| Patient | Strain | Infection                                     | Hospital Ward      | Diagnosis                                                                            | Age      | Source        | Isolation date | Risk factors                                                                                                                                                                                                                          | Antibiotics                                     | Symptoms                                                    |
|---------|--------|-----------------------------------------------|--------------------|--------------------------------------------------------------------------------------|----------|---------------|----------------|---------------------------------------------------------------------------------------------------------------------------------------------------------------------------------------------------------------------------------------|-------------------------------------------------|-------------------------------------------------------------|
|         | 12     | Multi-dose meropenem vial                     | NICU               |                                                                                      |          | J18M790       | 22/06/18       |                                                                                                                                                                                                                                       |                                                 |                                                             |
| P 1     | 4      |                                               | STx                |                                                                                      | 9 years  | Blood culture | 26/06/18       |                                                                                                                                                                                                                                       |                                                 |                                                             |
|         | 13     | Central line-associated bloodstream infection | STx                | Craniopharyngioma<br>Ventriculitis<br>Surgical wound dehiscence<br>PO CSF pseudocyst | 9 years  | Blood culture | 23/06/18       | Central venous catheter<br>Previous surgeries<br>Previous antibiotics                                                                                                                                                                 | Cefepime<br>Vancomycin<br>Meropenem<br>Colistin | Fever<br>Tachycardia                                        |
| P 2     | 11     |                                               | Emergency Oncology |                                                                                      | 15 years | Blood culture | 16/06/18       |                                                                                                                                                                                                                                       |                                                 |                                                             |
|         | 10     |                                               | Emergency Oncology |                                                                                      | 15 years | Blood culture | 16/06/18       |                                                                                                                                                                                                                                       |                                                 |                                                             |
|         | 3      | Fever and neutropenia                         | Emergency Oncology | Non-metastatic inguinal Ewing Sarcoma<br>Obesity                                     | 15 years | Blood culture | 16/06/18       | Chemotherapy June 4 to 8 vincristine, doxorubicin and cyclophosphamide<br>Private physician applied single dose: ceftriaxone, cefixime and gentamicin<br>Last hospitalization April 23 to 27 due to fever and neutropenia in Oncology | Cefepime<br>Amikacin                            | Odynophagia<br>Otalgia<br>Fever                             |
| P 3     | 9      | Central line-associated bloodstream infection | Emergency          | Acute lymphoblastic leukemia<br>Septic shock                                         | 10 years | Blood culture | 14/06/18       | Port catheter (6 months)<br>Chemotherapy                                                                                                                                                                                              | Meropenem<br>Vancomycin                         | Hypothermia<br>Tachycardia<br>Hypotension                   |
| P 4     | 1      | Bloodstream infection                         | Emergency Surgery  | Lennox Gastaut Syndrome<br>Altered swallowing mechanics                              | 3 years  | Blood culture | 09/06/18       | Hospitalization<br>Peripheral venous line<br>O2 per mask<br>Previous Antibiotics                                                                                                                                                      | Meropenem<br>Amikacin                           | Fever<br>Hypothermia<br>Tachycardia<br>Respiratory Distress |

|            |           |                                                                                              |                    |                                                                                                                                 |                 |               |          |                                                                                                                                                                                                                                       |                                                            |                                                                     |
|------------|-----------|----------------------------------------------------------------------------------------------|--------------------|---------------------------------------------------------------------------------------------------------------------------------|-----------------|---------------|----------|---------------------------------------------------------------------------------------------------------------------------------------------------------------------------------------------------------------------------------------|------------------------------------------------------------|---------------------------------------------------------------------|
| <b>P 5</b> | <b>2</b>  | Bloodstream infection                                                                        | Emergency          | Right scapular rhabdomyosarcoma with lung metastases. Post-operated wide local resection                                        | 3 years         | Blood culture | 03/06/18 | Peripherally inserted central venous catheter (PICC)<br>Outpatient chemo procedures                                                                                                                                                   | Cefepime<br>Amikacin<br>Colistin<br>Rifampicin             | Fever<br>Tachycardia<br>Cough                                       |
| <b>P 6</b> | <b>15</b> | Urinary tract infection related to urinary catheter                                          | NICU Surgery       | Intestinal Neurogliomatosis I type II                                                                                           | 1 year 9 months | Urine culture | 25/06/18 | Cystostomy Previous antibiotic (ertapenem)                                                                                                                                                                                            | Meropenem                                                  | Fever<br>Tachycardia<br>Increased cost due ileostomy<br>Dehydration |
| <b>P 7</b> | <b>8</b>  | Bloodstream infection                                                                        | NICU               | Anorectal malformation with vestibular fistula<br>Right Hydronephrosis<br>Post-intubation subglottic stenosis                   | 3 months        | Urine culture | 06/06/18 | Central venous catheter<br>Stay in Neonatology<br>Previous Antibiotics<br>Dysfunctional catheter                                                                                                                                      | Meropenem<br>Vancomycin                                    | Fever<br>Tachycardia<br>Respiratory Distress                        |
| <b>P 8</b> | <b>5</b>  | Bloodstream infection                                                                        | NICU               | Perinatal asphyxia<br>Hydronephrosis                                                                                            | 1 month         | Blood culture | 03/06/18 | Central venous Catheter<br>Previous Antibiotics (meropenem, vancomycin)                                                                                                                                                               | Piperacilin-Tazobactam<br>Amikacin<br>Colistin<br>Cefepime | Fever<br>Tachycardia                                                |
| <b>P 9</b> | <b>14</b> | Fever and neutropenia<br>Hospitalized from June 29 to July 4<br><br>Viral Panel + Rhinovirus | Emergency Oncology | Primary Neuroblastoma of the left adrenal gland. Stage 4 (bone, bone marrow and skin metastasis) with high risk in neoadjuvant. | 5 months        | Blood culture | 03/07/18 | Hospitalized in internal medicine from April 27 to May 5 due to sepsis<br>Tx cefepime 10 days<br>Chemotherapy May 10 to 15, June 13 to 17 cyclophosphamide, cisplatin, doxorubicin<br>Percutaneous left axillary catheter on 14/06/18 | Cefepime<br>amikacin                                       | Fever<br>Runny nose<br>Tachycardia<br>Cough                         |

|      |   |                         |                                |                                                                                                                                                   |          |               |          |                                                                                                                                                                                                                                                                                                                                                     |                                          |    |
|------|---|-------------------------|--------------------------------|---------------------------------------------------------------------------------------------------------------------------------------------------|----------|---------------|----------|-----------------------------------------------------------------------------------------------------------------------------------------------------------------------------------------------------------------------------------------------------------------------------------------------------------------------------------------------------|------------------------------------------|----|
| P 10 | 7 | Urinary tract infection | Infectious diseases outpatient | Left hydronephrosis<br>PO percutaneous extracorporeal nephrectomy<br>Renal litiasis (pb colonization of 2 l residual stones in left renal pelvis. | 14 years | Urine culture | 15/06/18 | Previous hospitalization 30/03/18 to 14/04/18 in urology due to complicated recurrent UTI with isolated multidrug resistant <i>P. aeruginosa</i> treated with colistin, ciprofloxacin 14 days<br>Mar 16 to 19 hospitalized due to percutaneous laser nephrolithotomy and double J catheter, nephrostomy catheter and urethral catheter were placed. | Fosfomicin<br>Nitrofurantoin prophylaxis | No |
|      | 6 |                         | Infectious diseases outpatient |                                                                                                                                                   | 14 years | Urine culture | 01/06/18 |                                                                                                                                                                                                                                                                                                                                                     |                                          |    |

Patient: number of patient; Strain: number of the strain isolated from the patient; Hospital Ward: Emergency (yellow), Surgical Therapy (STx, blue), Oncology (pink), Neonatal Intensive Care Unit (NICU, purple), Infectious diseases outpatient (green). Clade II/CC233 (blue); Clade I/CC233 (yellow); Clade III/CC111 (purple); Clade IV/CC235 (green).
