# Supplementary material for: New Variants of Pseudomonas aeruginosa High-Risk Clone ST233 Associated with an Outbreak in a Mexican Paediatric Hospital
Source: MDPI journal article supplement (doi:10.3390/microorganisms10081533), 2022-07-29
Supplement: s1 [file s1]

**Supplementary Table S2. Accession numbers (ID) of the *P. aeruginosa* strains analysed in this work**

| <b>Id at <u>PubMLST.org</u></b> | <b>Isolate</b> | <b>ST</b> |
|---------------------------------|----------------|-----------|
| 6714                            | HIM1/18        | 3237      |
| 7863                            | HIM2/18        | 3749      |
| 7898                            | HIM3B/18       | 3238      |
| 6715                            | HIM4/18        | 3238      |
| 7864                            | HIM5/18        | 3750      |
| 6716                            | HIM6/18        | 3239      |
| 7899                            | HIM7/18        | 235       |
| 6717                            | HIM8/18        | 3240      |
| 6718                            | HIM9/18        | 3241      |
| 7900                            | HIM10/18       | 3241      |
| 7901                            | HIM11/18       | 3241      |
| 7865                            | HIM12/18       | 3751      |
| 7902                            | HIM13/18       | 3241      |
| 7866                            | HIM14/18       | 3752      |
| 6719                            | HIM15/18       | 3242      |

IDs available at the public database for molecular typing: PubMLST.org.
